# Supplementary material
Source: PubMed Central journal article supplement (PMC5818272)
Supplement: NIHMS6291-supplement-2.pdf [file NIHMS6291-supplement-2.pdf]

Corresponding Author: Antoine Adamantidis

Manuscript Number: NN-A52161

Manuscript Type: Article

# Main Figures: 7

# Supplementary Figures: 8

# Supplementary Tables: 0

# Supplementary Videos: 0

## Reporting Checklist for Nature Neuroscience

This checklist is used to ensure good reporting standards and to improve the reproducibility of published results. For more information, please read [Reporting Life Sciences Research](#).

Please note that in the event of publication, it is mandatory that authors include all relevant methodological and statistical information in the manuscript.

### ► Statistics reporting, by figure

- Please specify the following information for each panel reporting quantitative data, and where each item is reported (section, e.g. Results, & paragraph number).
- Each figure legend should ideally contain an exact sample size (n) for each experimental group/condition, where n is an exact number and not a range, a clear definition of how n is defined (for example x cells from x slices from x animals from x litters, collected over x days), a description of the statistical test used, the results of the tests, any descriptive statistics and clearly defined error bars if applicable.
- For any experiments using custom statistics, please indicate the test used and stats obtained for each experiment.
- Each figure legend should include a statement of how many times the experiment shown was replicated in the lab; the details of sample collection should be sufficiently clear so that the replicability of the experiment is obvious to the reader.
- For experiments reported in the text but not in the figures, please use the paragraph number instead of the figure number.

**Note:** Mean and standard deviation are not appropriate on small samples, and plotting independent data points is usually more informative. When technical replicates are reported, error and significance measures reflect the experimental variability and not the variability of the biological process; it is misleading not to state this clearly.

|                            |                 | TEST USED             |              | n                                  |                       |                             | DESCRIPTIVE STATS (AVERAGE, VARIANCE) |             | P VALUE               |                 | DEGREES OF FREEDOM & F/t/z/R/ETC VALUE |  |
|----------------------------|-----------------|-----------------------|--------------|------------------------------------|-----------------------|-----------------------------|---------------------------------------|-------------|-----------------------|-----------------|----------------------------------------|--|
| FIGURE NUMBER              | WHICH TEST?     | SECTION & PARAGRAPH # | EXACT VALUE  | DEFINED?                           | SECTION & PARAGRAPH # | REPORTED?                   | SECTION & PARAGRAPH #                 | EXACT VALUE | SECTION & PARAGRAPH # | VALUE           | SECTION & PARAGRAPH #                  |  |
| example<br>1a              | one-way ANOVA   | Fig. legend           | 9, 9, 10, 15 | mice from at least 3 litters/group | Methods para 8        | error bars are mean +/- SEM | Fig. legend                           | p = 0.044   | Fig. legend           | F(3, 36) = 2.97 | Fig. legend                            |  |
| example<br>results, para 6 | unpaired t-test | Results para 6        | 15           | slices from 10 mice                | Results para 6        | error bars are mean +/- SEM | Results para 6                        | p = 0.0006  | Results para 6        | t(28) = 2.808   | Results para 6                         |  |

|                  |                         | TEST USED                                      |                | n        |                          |           | DESCRIPTIVE STATS<br>(AVERAGE, VARIANCE)                                                        |                     | P VALUE                  |                | DEGREES OF<br>FREEDOM &<br>F/t/z/R/ETC VALUE |                 |
|------------------|-------------------------|------------------------------------------------|----------------|----------|--------------------------|-----------|-------------------------------------------------------------------------------------------------|---------------------|--------------------------|----------------|----------------------------------------------|-----------------|
| FIGURE<br>NUMBER | WHICH TEST?             | SECTION &<br>PARAGRAPH #                       | EXACT<br>VALUE | DEFINED? | SECTION &<br>PARAGRAPH # | REPORTED? | SECTION &<br>PARAGRAPH #                                                                        | EXACT VALUE         | SECTION &<br>PARAGRAPH # | VALUE          | SECTION &<br>PARAGRAPH #                     |                 |
| +<br>-           | 1i<br>NRE<br>M 1<br>Hz  | unpaired<br>two-tailed<br>Student's t-<br>Test | Fig.<br>legend | 10,9     | mice from 3 litters      |           | error bars are<br>mean +/- SEM, YFP<br>(66.74 ± 6.673<br>N=10), ChETA<br>(30.41 ± 2.686<br>N=9) | Not<br>report<br>ed | 0.0002                   | Fig<br>legend  | t=4.846 df=17                                | Not<br>reported |
| +<br>-           | 1i<br>NRE<br>M 20<br>Hz | unpaired<br>two-tailed<br>Student's t-<br>Test | Fig.<br>legend | 11,9     | mice from 3 litters      |           | error bars are<br>mean +/- SEM, YFP<br>(66.44 ± 6.397<br>N=11), ChETA<br>(2.94 ± 7.11 N=9)      | Not<br>report<br>ed | < 0.0001                 | Fig<br>legend  | t=8.912 df=18                                | Not<br>reported |
| +<br>-           | 1i<br>NRE<br>M 1 s      | unpaired<br>two-tailed<br>Student's t-<br>Test | Fig.<br>legend | 4, 3     | mice from 3 litters      |           | error bars are<br>mean +/- SEM, YFP<br>(61 ± 4.4 N=4),<br>ChETA (3.6 ± 0.30<br>N=3)             | Not<br>report<br>ed | 0.0001                   | Fig<br>legend  | t=11 df=5                                    | Not<br>reported |
| +<br>-           | 1i<br>REM<br>1 Hz       | unpaired<br>two-tailed<br>Student's t-<br>Test | Fig.<br>legend | 10,8     | mice from 3 litters      |           | error bars are<br>mean +/- SEM, YFP<br>(72.2 ± 3.45 N=10),<br>ChETA (63.6 ± 5.22<br>N=8)        | Not<br>report<br>ed | 0.1739                   | Fig<br>legend  | t=1.42 df=16                                 | Not<br>reported |
| +<br>-           | 1i<br>REM<br>20<br>Hz   | unpaired<br>two-tailed<br>Student's t-<br>Test | Fig.<br>legend | 11,9     | mice from 3 litters      |           | error bars are<br>mean +/- SEM, YFP<br>(61.3 ± 3.90 N=8),<br>ChETA (67.7 ± 4.56<br>N=8)         | Not<br>report<br>ed | 0.3093                   | Fig<br>legend  | t=1.06 df=14                                 | Not<br>reported |
| +<br>-           | 1i<br>REM<br>1 s        | unpaired<br>two-tailed<br>Student's t-<br>Test | Fig.<br>legend | 5,3      | mice from 3 litters      |           | error bars are<br>mean +/- SEM, YFP<br>(69.0 ± 5.02 N=5),<br>ChETA (71.4 ± 12.8<br>N=3)         | Not<br>report<br>ed | 0.8384                   | Fig<br>legend  | t=0.213 df=6                                 | Not<br>reported |
| +<br>-           | 2e                      | unpaired<br>two-tailed<br>Student's t-<br>Test | Fig.<br>legend | 5,5      | slices from 5<br>animals |           | error bars are<br>mean +/- SEM<br>61.70 +/- 12.93,<br>N=5, bic (5.167 ±<br>0.54 N=5)            | Not<br>report<br>ed | 0.0119                   | Fig<br>legend  | t=4.369 df=4.014                             | Not<br>reported |
| +<br>-           | 2f                      | unpaired<br>two-tailed<br>Student's t-<br>Test | Fig.<br>legend | 5,5      | slices from 5<br>animals |           | error bars are mea<br>(0.901 +/- 0.0515<br>SEM, N=5, bic<br>(0.909 ± 0.08 N=5)                  | Not<br>report<br>ed | p=0.135                  | Fig<br>legend  | t=0.0838 df=8                                | Not<br>reported |
| +<br>-           | 3f<br>1Hz               | unpaired<br>two-tailed<br>Student's t-<br>Test | Fig.<br>legend | 5,7      | mice from 3 litters      |           | error bars are<br>mean +/- SEM,<br>YFP(57.9 ± 3.82<br>N=5), ChETA (34.9<br>± 2.57 N=7)          | Not<br>report<br>ed | 0.0004                   | Fig<br>legend  | t=5.21 df=10                                 | Not<br>reported |
| +<br>-           | 3f 20<br>Hz             | unpaired<br>two-tailed<br>Student's t-<br>Test | Fig.<br>legend | 5,7      | mice from 3 litters      |           | error bars are<br>mean +/- SEM, YFP<br>(65.9 ± 4.10 N=5),<br>ChETA (11.7 ± 1.91<br>N=7)         | Not<br>report<br>ed | < 0.0001                 | Fig<br>legend  | t=13.2 df=10                                 | Not<br>reported |
| +<br>-           | 3f on                   | unpaired<br>two-tailed<br>Student's t-<br>Test | Fig.<br>legend | 5,7      | mice from 3 litters      |           | error bars are<br>mean +/- SEM,<br>YFP(63.7 ± 3.84<br>N=5), ChETA (2.77<br>± 0.299 N=7)         | Not<br>report<br>ed | < 0.0001                 | Fig.<br>legend | t=19.1 df=10                                 | Not<br>reported |

|        |           |                                      |             |                                                                                                                      |                      |  |                                                                           |              |          |             |               |              |
|--------|-----------|--------------------------------------|-------------|----------------------------------------------------------------------------------------------------------------------|----------------------|--|---------------------------------------------------------------------------|--------------|----------|-------------|---------------|--------------|
| +<br>- | 3g 1 Hz   | unpaired two-tailed Student's t-Test | Fig. legend | 6,7                                                                                                                  | mice from 3 litters  |  | error bars are mean +/- SEM, YFP(18.0 ±3.47 N=6), ChETA (16.7 ±3.59 N=7)  | Not reported | 0.8046   | Fig. legend | t=0.253 df=11 | Not reported |
| +<br>- | 3g 20 Hz  | unpaired two-tailed Student's t-Test | Fig. legend | 6,7                                                                                                                  | mice from 3 litters  |  | error bars are mean +/- SEM, YFP(22.7 ±4.817 N=6), ChETA (17.7 ±3.82 N=7) | Not reported | 0.4259   | Fig. legend | t=0.827 df=11 | Not reported |
| +<br>- | 3g on     | unpaired two-tailed Student's t-Test | Fig. legend | 6,7                                                                                                                  | mice from 3 litters  |  | error bars are mean +/- SEM, YFP(15.5 ±1.70 N=6), ChETA (18.1 ±3.92 N=7)  | Not reported | 0.5815   | Fig. legend | t=0.568 df=11 | Not reported |
| +<br>- | 3h 1 Hz   | unpaired two-tailed Student's t-Test | Fig. legend | 5,7                                                                                                                  | mice from 3 litters  |  | error bars are mean +/- SEM, YFP(72.7 ±4.84 N=5), ChETA (73.7 ±4.989 N=7) | Not reported | 0.8919   | Fig. legend | t=0.139 df=10 | Not reported |
| +<br>- | 3h 20Hz   | unpaired two-tailed Student's t-Test | Fig. legend | 5,7                                                                                                                  | mice from 3 litters  |  | error bars are mean +/- SEM, YFP(76.5 ±6.37 N=5), ChETA 62.1 ±3.93 N=7)   | Not reported | 0.0696   | Fig. legend | t=2.03 df=10  | Not reported |
| +<br>- | 3 h on    | unpaired two-tailed Student's t-Test | Fig. legend | 5,7                                                                                                                  | mice from 3 litters  |  | error bars are mean +/- SEM, YFP(78.1 ±4.47 N=5), ChETA 61.6 ±6.29 N=7)   | Not reported | 0.0786   | Fig. legend | t=1.96 df=10  | Not reported |
| +<br>- | 5e        | unpaired two-tailed Student's t-Test | Fig. legend | 4,6                                                                                                                  | mice from 3 litters` |  | error bars are mean +/- SEM, YFP(64.1 ±6.25 N=4), ChETA 18.7 ±1.56 N=6)   | Not reported | < 0.0001 | Fig. legend | t=8.54 df=8   | Not reported |
| +<br>- | 5f        | unpaired two-tailed Student's t-Test | Fig. legend | 5,6                                                                                                                  | mice from 3 litters  |  | error bars are mean +/- SEM, YFP(67.5 ±5.14 N=5), ChETA 54.1 ±5.30 N=6)   | Not reported | 0.1073   | Fig. legend | t=1.79 df=9   | Not reported |
| +<br>- | 5g        | unpaired two-tailed Student's t-Test | Fig. legend | 4,6                                                                                                                  | mice from 3 litters  |  | error bars are mean +/- SEM, YFP(30.2 ±12.4 N=4), ChETA (15.4 ± 1.65 N=6) | Not reported | 0.1753   | Fig. legend | t=1.49 df=8   | Not reported |
| +<br>- | 7d before | unpaired-t test, Two-tailed          | Fig. legend | 4,4. N represents the total number of animals, each animal value is the average of at least three stimulation trials | mice from 3 litters  |  | error bars are mean +/- SEM, YFP(11.5 ±2.07 N=4), ChETA (15.4 ± 2.20 N=4) | Not reported | 0.2392   | Fig. legend | t=1.31 df=6   | Not reported |
| +<br>- | 7d +1min  | unpaired-t test, Two-tailed          | Fig. legend | 4,4                                                                                                                  | mice from 3 litters  |  | error bars are mean +/- SEM, YFP(11.4 ±1.97 N=4), ChETA (28.6 ± 4.47 N=4) | Not reported | 0.0126   | Fig. legend | t=3.51 df=6   | Not reported |

|        |             |                                       |             |                                                       |                     |  |                                                                                                                                                                                               |              |                                                   |                               |                                 |              |
|--------|-------------|---------------------------------------|-------------|-------------------------------------------------------|---------------------|--|-----------------------------------------------------------------------------------------------------------------------------------------------------------------------------------------------|--------------|---------------------------------------------------|-------------------------------|---------------------------------|--------------|
| +<br>- | 7d+<br>2min | unpaired-t test, Two-tailed           | Fig. legend | 4,4                                                   | mice from 3 litters |  | error bars are mean +/- SEM, YFP(12.1 ± 4.26 N=4), ChETA (35.0 ± 3.68 N=4)                                                                                                                    | Not reported | 0.0065                                            | Fig. legend                   | t=4.08 df=6                     | Not reported |
| +<br>- | 7e before   | unpaired-t test, Two-tailed           | Fig. legend | 4,4                                                   | mice from 3 litters |  | error bars are mean +/- SEM, YFP(81.6 ± 3.41 N=4), ChETA (81.0 ± 2.05 N=4)                                                                                                                    | Not reported | 0.8837                                            | Fig. legend                   | t=0.153 df=6                    | Not reported |
| +<br>- | 7e, + 1 min | unpaired-t test, Two-tailed           | Fig. legend | 4,4                                                   | mice from 3 litters |  | error bars are mean +/- SEM, YFP(80.9 ± 3.20 N=4), ChETA (53.2 ± 7.86 N=4)                                                                                                                    | Not reported | 0.0171                                            | Fig. legend                   | t=3.27 df=6                     | Not reported |
| +<br>- | 7e, + 2 min | unpaired two-tailed Student's t-Test  | Fig. legend | 4,4                                                   | mice from 3 litters |  | error bars are mean +/- SEM, YFP(81.0 ± 6.08 N=4), ChETA (47.7 ± 9.84 N=4)                                                                                                                    | Not reported | 0.0103                                            | Fig. legend                   | t=3.68 df=6                     | Not reported |
| +<br>- | 7f before   | unpaired two-tailed Student's t-Test  | Fig. legend | 4,4                                                   | mice from 3 litters |  | error bars are mean +/- SEM, YFP(8.02 ± 1.86 N=4), ChETA (14.0 ± 1.63 N=4)                                                                                                                    | Not reported | 0.0529                                            | Fig. legend                   | t=2.41 df=6                     | Not reported |
| +<br>- | 7f, + 1 min | unpaired two-tailed Student's t-Test  | Fig. legend | 4,4                                                   | mice from 3 litters |  | error bars are mean +/- SEM, YFP(7.41 ± 1.256 N=4), ChETA (12.7 ± 0.778 N=4)                                                                                                                  | Not reported | 0.0112                                            | Fig. legend                   | t=3.61 df=6                     | Not reported |
| +<br>- | 7f, + 2 min | unpaired two-tailed Student's t-Test  | Fig. legend | 4,4                                                   | mice from 3 litters |  | error bars are mean +/- SEM, YFP(8.53 ± 1.74 N=4), ChETA (13.7 ± 2.03 N=4)                                                                                                                    | Not reported | 0.1003                                            | Fig. legend                   | t=1.94 df=6                     | Not reported |
| +<br>- | S4 c        | One- way ANOVA within subject design  | Fig. legend | 8 for BS (non stimulated), 7 for YFP, and 8 for ChETA | 4 litters           |  | not reported in the text                                                                                                                                                                      | Not reported | P < 0.0001                                        | S.Fig legend                  | For wake F (5, 28) = 21.47      | Not reported |
| +<br>- | S4 d        | One- way ANOVA withing subject design | Fig. legend | 8 for BS (non stimulated), 5 for YFP, and 5 for ChETA | 4 litters           |  | not reported in the text                                                                                                                                                                      | Not reported | 0.0001                                            | S.Fig legend                  | F (DFn, DFd), F (3, 14) = 14.94 | Not reported |
| +<br>- | S8 b        | unpaired two-tailed Student's t-Test  | Fig. legend | 10,9                                                  | mice from 3 litters |  | Mean latencies ± S.E.M of NREM sleep to wake transitions upon optical stimulation of LHGABA terminals in the posterior TRN field in control (white; n=10) and ChETA-EYFP (blue; n=9) animals. | Fig. legend  | P<0.05(1 Hz), P<0.05(20Hz), P< 0.0001 (1s pulses) | S.Fig legend, Figure (*, ***) | -                               | -            |

|        |           |                                      |               |                                 |                                                                                            |               |                                                                                                                                                                                                 |              |                         |                              |                                                                                                       |              |
|--------|-----------|--------------------------------------|---------------|---------------------------------|--------------------------------------------------------------------------------------------|---------------|-------------------------------------------------------------------------------------------------------------------------------------------------------------------------------------------------|--------------|-------------------------|------------------------------|-------------------------------------------------------------------------------------------------------|--------------|
| +<br>- | S8 c      | unpaired two-tailed Student's t-Test | Fig. legend   | 5,7                             | mice from 3 litters                                                                        |               | Mean latencies $\pm$ S.E.M of REM sleep to wake transitions upon optical stimulation of LHGABA terminals in the posterior TRN field in control (white; n=5) and ChETA-EYFP (blue; n=7) animals. | Fig. legend  | non significant         | S.Fig legend                 | -                                                                                                     | -            |
| +<br>- | 4b        | One- way ANOVA                       | Fig. legend   | 4,4,4,4,3                       | mice from at least 3 litters                                                               |               | error bars are mean $\pm$ SEM,                                                                                                                                                                  | Not reported | 0.0009                  | S.Fig legend                 | 1s YFP_LC vs. 1sCheta_LC, t=3.36; 1s YFP_MS vs. 1S_MS_Cheta,t 0.52; 1s YFP_Ms vs. 1s_PVaCheta, t=2.59 | Not reported |
| +<br>- | 4c        | One- way ANOVA                       | Fig. legend   | 4,4,4,4,3                       | mice from at least 3 litters                                                               |               | error bars are mean $\pm$ SEM,                                                                                                                                                                  | Not reported | 0.019                   | S.Fig legend                 | 1s YFP_LC vs. 1sCheta_LC, t=3.6; 1s YFP_MS vs. 1S_MS_Cheta,t 0.50; 1s YFP_Ms vs. 1s_PVaCheta, t=0.71  | Not reported |
| +<br>- | 6e        | One- way ANOVA                       | Fig. legend   | 15 events per animal            | 4 animals per condition                                                                    | figure legend | Error bars are mean $\pm$ SEM, SS (53.62 $\pm$ 5.38 N=4), YFP (59.21 $\pm$ 3.14 N=4), ArchT (117 $\pm$ 12.31 N=4)                                                                               |              | p < 0.0001              | figure legend (**)           | t (3, 12)=21.45                                                                                       | not reported |
| +<br>- | 6g        | unpaired two-tailed Student's t-Test | figure legend | 5 stimulation events per animal | 4 animals per condition                                                                    | figure legend | error bars are mean $\pm$ SEM, YFP (0.0872 $\pm$ 0.005 N=4), ArchT (0.118 $\pm$ 0.006 N=4)                                                                                                      |              | p=0.0052                | figure legend (**)           | t= 4.42                                                                                               | not reported |
| +<br>- | 6h, right | unpaired two-tailed Student's t-Test | figure legend | 5 stimulation events per animal | 4 animals per condition                                                                    | figure legend | error bars are mean $\pm$ SEM, YFP (0.0169 $\pm$ 0.0017, N=4), ArchT (0.0137 $\pm$ 0.00179 N=4)                                                                                                 |              | p=0.28                  | figure legend (n.s)          | t= 1.16                                                                                               | not reported |
| +<br>- | 3d 20 Hz  | Wilcoxon signed rank test            | MS            | 57                              | Firing rate of. 57 out of 70 recorded cells was reduced upon 20 Hz optogenetic stimulation | MS            | mean $\pm$ SEM                                                                                                                                                                                  | Fig. legend  | p=1.62569845 693310e-10 | MS                           | -                                                                                                     | -            |
| +<br>- | 3d on     | unpaired two-tailed Student's t-Test | Not reported  | 17                              | 17 of 17 tested cells reduced firing rate upon stimulation with 2 s continuous pulses      | MS            | mean $\pm$ SEM                                                                                                                                                                                  | Fig. legend  | p=0.0000014             | Not reported                 | t(32,32)=5.89                                                                                         | not reported |
| +<br>- | 3d        | One- way ANOVA                       | Fig. Legend   | 70                              | Optostimulation led to a frequency-dependent decrease in the firing rate                   | Fig. legend   | mean $\pm$ SEM                                                                                                                                                                                  | Fig. legend  | p=9.42422748 239997e-16 | Fig. legend, Figure (*, ***) | F(3,3)=38.2831                                                                                        | not reported |
| +<br>- | 3e NREM   | Wilcoxon signed rank test            | not reported  | 46                              | Coefficient of firing rate variability (CV) of TRN cells across NREM sleep and wake states | Fig. Legend   | mean $\pm$ SEM                                                                                                                                                                                  | not reported | p=3,523e -09            | Ms, Fig. legend, Figure (*)  | -                                                                                                     | -            |

|        |                                    |                                                |                     |         |                                                                                                                                                                                        |                  |                                                         |                     |                 |                                          |                 |                 |
|--------|------------------------------------|------------------------------------------------|---------------------|---------|----------------------------------------------------------------------------------------------------------------------------------------------------------------------------------------|------------------|---------------------------------------------------------|---------------------|-----------------|------------------------------------------|-----------------|-----------------|
| +<br>- | 3e<br>20Hz                         | Wilcoxon<br>signed rank<br>test                | not<br>report<br>ed | 46      | Coefficient of firing<br>rate variability (CV)<br>of TRN cells across<br>NREM sleep and<br>upon optogenetic<br>activation of<br>LHGABA-TRN<br>circuit using<br>stimulation at 20<br>Hz | Fig.<br>Legend   | mean +/- SEM                                            | not<br>report<br>ed | p=0.0086        | Ms,<br>Fig.<br>legend,<br>Figure<br>(**) |                 |                 |
| +<br>- | S7 g                               | Wilcoxon<br>signed rank<br>test                | MS                  | 10      | Coefficient of firing<br>rate variability (CV)<br>of TRN cells across<br>NREM sleep and<br>upon optogenetic<br>activation of<br>LHGABA-TRN<br>circuit using 2s<br>pulses stimulation   | Fig.<br>Legend   | mean +/- SEM                                            | not<br>report<br>ed | p=0.00195       | Ms, Fig.<br>legend,<br>Figure<br>(***)   |                 |                 |
| +<br>- | Resul<br>ts,pa<br>ge 4             | t-test, two-<br>tailed                         | MS                  | 18      | Normalized firing<br>rates (Hz) in LH<br>cells (n=18) during<br>baseline (BL) and<br>optostimulation<br>with continuous<br>pulses<br>(1s)                                              | Figure<br>legend | mean +/- SEM                                            | not<br>report<br>ed | p=0.0306        | Ms, Fig.<br>legend,<br>Figure<br>(*)     | t(17,17)=-2.359 | Not<br>reported |
| +<br>- | S3e                                | Binomial<br>test                               | MS                  | 13      | Firing rates of<br>LHGABA cells<br>before and after<br>wakening (n=13<br>cells, 0 -transition<br>NREM sleep-<br>wakefulness)                                                           | Figure<br>legend | mean +/- SEM                                            | Not<br>report<br>ed | P=0.02          | Main<br>text,<br>Fig<br>legend           | -               | -               |
| +<br>- | S5c<br>NRE<br>M to<br>wake<br>1Hz  | unpaired<br>two-tailed<br>Student's t-<br>Test | Figure<br>legend    | 2,2     | Graph<br>representing<br>summary data of<br>the latency to<br>wake from NREM<br>sleep (> 10 events<br>from 2 different<br>animals per group).                                          | Fig<br>legend    | 66.7 +/- 6.67,<br>n=10 ; ChETA: 46.4<br>+/- 14.6 (n=5)  | Not<br>report<br>ed | non significant | Not<br>reported                          | -               | -               |
| +<br>- | S5c<br>NRE<br>M to<br>wake<br>20HZ | unpaired<br>two-tailed<br>Student's t-<br>Test | Figure<br>legend    | 2,2     | Graph<br>representing<br>summary data of<br>the latency to<br>wake from NREM<br>sleep (> 10 events<br>from 2 different<br>animals per group).                                          | Fig<br>legend    | 66.4 +/- 6.4<br>control (n=10);<br>106+/-13.4 (n=19)    | Not<br>report<br>ed | p= 0.002        | Figure<br>(*)                            | -               | -               |
| +<br>- | S5c<br>NRE<br>M to<br>wake<br>1s   | unpaired<br>two-tailed<br>Student's t-<br>Test | Figure<br>legend    | 2,2     | Graph<br>representing<br>summary data of<br>the latency to<br>wake from NREM<br>sleep (> 10 events<br>from 2 different<br>animals per group).                                          | Fig<br>legend    | 61.2 +/- 4.38<br>control ( n=4); 108<br>+/- 13.0 ( n=9) | Not<br>report<br>ed | p= 0.02         | Figure<br>(*)                            | -               | -               |
| +<br>- | page<br>5<br>PPR                   | paired two-<br>tailed<br>Wilcoxon<br>test      | test                | 5 pairs | peak values in PPR                                                                                                                                                                     | 5                | Peak 1: -61.7 ± 12<br>pA; Peak 2: -54.53<br>± 10.2 pA   | page 5              | P=0.187         | not<br>reported                          | -               | -               |

## ► Representative figures

1. Are any representative images shown (including Western blots and immunohistochemistry/staining) in the paper?

If so, what figure(s)?

yes, see 2 for detailed description

2. For each representative image, is there a clear statement of how many times this experiment was successfully repeated and a discussion of any limitations in repeatability?

If so, where is this reported (section, paragraph #)?

All primary figures (1-5) and supplemental figures s2 and s4 show representative current, voltage trace, extracellular spikes from individual neurons to show either direct or postsynaptic responses to blue light stimulation.

All figures 1a, 2a,b, 4b, s1a-f, s7a show representative pictures of Immunohistofluorescence or viral transfection from one animal that represent the average observation.

Figures 1b, 3b, 4c,d, and 5b,c represent EEG/EMG traces from one representative animal.

Raw traces:

Fig.2b, Auto-correlograms and spike waveforms, Fig.S4a, Fig.S4b, Fig.S4c are available for each recorded unit

## ► Statistics and general methods

1. Is there a justification of the sample size?

If so, how was it justified?

Where (section, paragraph #)?

Even if no sample size calculation was performed, authors should report why the sample size is adequate to measure their effect size.

Yes, all figures include clear statements regarding the number of cells/animals included in the experiment. For Fig. 1c, n is indicated on p. 3. For Fig. 3g-i, n is indicated on p 4. For Fig.42-h, n is indicated on p 6. For Fig. 5d-f, n is indicated on p 7. Figure 2d shows representative IPSCs from one cells (VGAT::*IRES-Cre*) with averaged current traces from 5 sweeps, however this evoked IPSCs were repeated in every cell recorded. We do mention, however, that not all light flashes resulted in an evoked IPSC. Supplemental figures 2b show representative traces that were repeated in 8 cells.

For the EEG/EMG representative traces showed in Fig 1b, 3b, 4c,d, and 5b,c, for each animal, the stimulation (either blue or yellow light) during a specific sleep state have been repeated at least 10 times per animal and per frequencies of stimulation in order to get an optimal average of the sleep state duration representative for each animal. The number of animal (n) and the number of time the stimulation has been apply are indicated in the figure legend.

For the immunohistofluorescence showed in Fig1a, 2a,b, 4b, s1a-f, s7a, the quantification of the number of cells/sections/animals is reported either in the text. The transfection pictures showed these figures are representative transfection observed regularly on Tg(VGAT::*IRES*)-Cre animals. No justifications are mentioned in the text.

Experimental sample size were defined based on previous studies. No statistical methods were used to pre-determine sample sizes.

2. Are statistical tests justified as appropriate for every figure?

Where (section, paragraph #)?

Statistical tests are not justified, but are described for each test in the figure legend.

- a. If there is a section summarizing the statistical methods in the methods, is the statistical test for each experiment clearly defined?
- Yes there is a section summarizing statistical methodology in the methods, and t-tests and One-way ANOVA followed by posthoc tests are defined, except where otherwise noted.
- b. Do the data meet the assumptions of the specific statistical test you chose (e.g. normality for a parametric test)?
- Where is this described (section, paragraph #)?
- Statistics for in vitro data were always tested for normality, and we detected no abnormalities in distribution across all in vitro electrophysiological and in vivo data tests. In Vivo behavioral data distribution was assumed to be normal but this was not formally tested. This is described in the online methods in the statistic section.
- c. Is there any estimate of variance within each group of data? Is the variance similar between groups that are being statistically compared?
- Where is this described (section, paragraph #)?
- Yes, variance was routinely described, and included as standard error of the mean (SEM). This is noted in figure captions, as well as methods section.
- d. Are tests specified as one- or two-sided?
- No, tests are not specified, but were always two-sided.
- e. Are there adjustments for multiple comparisons?
- Yes, we routinely used statistical adjustments for multiple comparisons (Student-Newman-Keuls).  $\alpha$  adjusted for multiple comparisons in Fig 2d and S.Fig 2g
3. Are criteria for excluding data points reported? Was this criterion established prior to data collection? Where is this described (section, paragraph #)?
- In vitro electrophysiological data was discarded if intrinsic cell properties were more than 3SDs outside group mean (ie. resting membrane potential, input resistance) and / or if recording stability changed by >15%, as measured through series resistance. This is described in the In vitro electrophysiology section. Animal with no viral expression, abnormal sleep-wake cycle (3SD outside group mean) or optical fiber implants outside the target area were discarded from the study. This is described in the In vivo polysomnographic recordings section.
4. Define the method of randomization used to assign subjects (or samples) to the experimental groups and to collect and process data. If no randomization was used, state so. Where does this appear (section, paragraph #)?
- A statement that Tg(VGAT::IRES)-Cre mice were randomly assigned to viral injection, a statement is included in the plasmid and viral targeting in the online methods.
5. Is a statement of the extent to which investigator knew the group allocation during the experiment and in assessing outcome included? If no blinding was done, state so. Where (section, paragraph #)?
- In vitro electrophysiological and in vivo data was not collected blindly, however a statement was included in the text that Tg(VGAT::IRES)-Cre mice were randomly assigned to viral injection, a statement is included in the plasmid and viral targeting in the online methods. In vivo electrophysiological analysis was performed in a batch mode, simultaneously for control and experimental recordings.
6. For experiments in live vertebrates, is a statement of compliance with ethical guidelines/regulations included? Where (section, paragraph #)?
- Yes, experiments in live vertebrates complied with institutional and national guidelines and regulations, and this information is included on the mice section of the online methods.



7. Is the species of the animals used reported?  
Where (section, paragraph #)?
- Yes, throughout the text.
8. Is the strain of the animals (including background strains of KO/transgenic animals used) reported?  
Where (section, paragraph #)?
- Yes, throughout the text. Original publication reported the used mouse line is indicated on the online methods in the animal section.
9. Is the sex of the animals/subjects used reported?  
Where (section, paragraph #)?
- Yes, in the online methods in the mice section.
10. Is the age of the animals/subjects reported?  
Where (section, paragraph #)?
- Yes, the online methods in the in vitro electrophysiology section specifies the age of animals for slice electrophysiology and in the in vitro polysomnographic recordings of the online methods for in vivo experiments.
11. For animals housed in a vivarium, is the light/dark cycle reported?  
Where (section, paragraph #)?
- Yes, all experiments took place between 12-7PM in the text p5 and in the mice section of the online method.
12. For animals housed in a vivarium, is the housing group (i.e. number of animals per cage) reported?  
Where (section, paragraph #)?
- Mice were housed in individual cage. See mice section in the Online Methods.
13. For behavioral experiments, is the time of day reported (e.g. light or dark cycle)?  
Where (section, paragraph #)?
- Yes, all experiments took place between 12-7PM in the text p5 and in the mice section of the online method.
14. Is the previous history of the animals/subjects (e.g. prior drug administration, surgery, behavioral testing) reported?  
Where (section, paragraph #)?
- Yes. The viral injection, the surgery and the polysomnographic recording are described in their respective section in the online methods.
- a. If multiple behavioral tests were conducted in the same group of animals, is this reported?  
Where (section, paragraph #)?
- The animals transfected with ChETA were used for the stimulation during both NREM and REM sleep. This is mentioned in the online methods, optical stimulation section.
15. If any animals/subjects were excluded from analysis, is this reported?  
Where (section, paragraph #)?
- This is reported in the in vivo recordings in the online methods.
- a. How were the criteria for exclusion defined?  
Where is this described (section, paragraph #)?
- in vitro electrophysiological data was discarded if intrinsic cell properties were more than 3SDs outside group mean (ie. resting membrane potential, input resistance) and / or if recording stability changed by >15%, as measured through series resistance. Sleep analysis was not performed blind to the conditions of the experiments. However, polysomnographic scoring was tested blindly by two independent scorers and was found to lie within a 95% confidence interval (described in the Online Methods in the Polysomnographic recording section).

- b. Specify reasons for any discrepancy between the number of animals at the beginning and end of the study.

Where is this described (section, paragraph #)?

False positive animals could have been injected and /or implanted and when through the entire process for in vitro or in vivo experiments. As mentioned in the online methods, after completion of the experiment, animals are perfused in order to check the viral expression and the position of the optic fiber. If one of this two conditions are judged not satisfactory, the animal was discarded from the experiment.

## ► Reagents

1. Have antibodies been validated for use in the system under study (assay and species)?

All the antibodies have been validated for use in mice.

- a. Is antibody catalog number given?

Where does this appear (section, paragraph #)?

the catalog number is reported in the immunohistochemistry sections of the online methods.

- b. Where were the validation data reported (citation, supplementary information, Antibodypedia)?

Where does this appear (section, paragraph #)?

2. Cell line identity

- a. Are any cell lines used in this paper listed in the database of commonly misidentified cell lines maintained by [ICLAC](#) and [NCBI Biosample](#)?

Where (section, paragraph #)?

- b. If yes, include in the Methods section a scientific justification of their use--indicate here in which section and paragraph the justification can be found.

- c. For each cell line, include in the Methods section a statement that specifies:

- the source of the cell lines
- have the cell lines been authenticated? If so, by which method?
- have the cell lines been tested for mycoplasma contamination?

Where (section, paragraph #)?

## ▶ Data deposition

Data deposition in a public repository is mandatory for:

- Protein, DNA and RNA sequences
- Macromolecular structures
- Crystallographic data for small molecules
- Microarray data

Deposition is strongly recommended for many other datasets for which structured public repositories exist; more details on our data policy are available [here](#). We encourage the provision of other source data in supplementary information or in unstructured repositories such as [Figshare](#) and [Dryad](#).

We encourage publication of Data Descriptors (see [Scientific Data](#)) to maximize data reuse.

- Are accession codes for deposit dates provided?

Where (section, paragraph #)?

## ▶ Computer code/software

Any custom algorithm/software that is central to the methods must be supplied by the authors in a usable and readable form for readers at the time of publication. However, referees may ask for this information at any time during the review process.

- Identify all custom software or scripts that were required to conduct the study and where in the procedures each was used.

Custom MATLAB functions were used to perform individual steps of data analysis, described in SI: Methods, Signal processing and data analysis.  
Sleep scoring was performed in Spike 5, using the Sleepscore v1.01 script. Source code can be obtained from the authors upon request.

- If computer code was used to generate results that are central to the paper's conclusions, include a statement in the Methods section under "**Code availability**" to indicate whether and how the code can be accessed. Include version information as necessary and any restrictions on availability.

## ▶ Human subjects

- Which IRB approved the protocol?

Where is this stated (section, paragraph #)?

- Is demographic information on all subjects provided?

Where (section, paragraph #)?

- Is the number of human subjects, their age and sex clearly defined?

Where (section, paragraph #)?

- Are the inclusion and exclusion criteria (if any) clearly specified?

Where (section, paragraph #)?

5. How well were the groups matched?

Where is this information described (section, paragraph #)?

6. Is a statement included confirming that informed consent was obtained from all subjects?

Where (section, paragraph #)?

7. For publication of patient photos, is a statement included confirming that consent to publish was obtained?

Where (section, paragraph #)?

## ► fMRI studies

For papers reporting functional imaging (fMRI) results please ensure that these minimal reporting guidelines are met and that all this information is clearly provided in the methods:

1. Were any subjects scanned but then rejected for the analysis after the data was collected?

a. If yes, is the number rejected and reasons for rejection described?

Where (section, paragraph #)?

2. Is the number of blocks, trials or experimental units per session and/or subjects specified?

Where (section, paragraph #)?

3. Is the length of each trial and interval between trials specified?

4. Is a blocked, event-related, or mixed design being used? If applicable, please specify the block length or how the event-related or mixed design was optimized.

5. Is the task design clearly described?

Where (section, paragraph #)?

6. How was behavioral performance measured?

7. Is an ANOVA or factorial design being used?

8. For data acquisition, is a whole brain scan used?

If not, state area of acquisition.

a. How was this region determined?

9. Is the field strength (in Tesla) of the MRI system stated?
- a. Is the pulse sequence type (gradient/spin echo, EPI/spiral) stated?
- b. Are the field-of-view, matrix size, slice thickness, and TE/TR/flip angle clearly stated?
10. Are the software and specific parameters (model/functions, smoothing kernel size if applicable, etc.) used for data processing and pre-processing clearly stated?
11. Is the coordinate space for the anatomical/functional imaging data clearly defined as subject/native space or standardized stereotaxic space, e.g., original Talairach, MNI305, ICBM152, etc? Where (section, paragraph #)?
12. If there was data normalization/standardization to a specific space template, are the type of transformation (linear vs. nonlinear) used and image types being transformed clearly described? Where (section, paragraph #)?
13. How were anatomical locations determined, e.g., via an automated labeling algorithm (AAL), standardized coordinate database (Talairach daemon), probabilistic atlases, etc.?
14. Were any additional regressors (behavioral covariates, motion etc) used?
15. Is the contrast construction clearly defined?
16. Is a mixed/random effects or fixed inference used?
- a. If fixed effects inference used, is this justified?
17. Were repeated measures used (multiple measurements per subject)?
- a. If so, are the method to account for within subject correlation and the assumptions made about variance clearly stated?
18. If the threshold used for inference and visualization in figures varies, is this clearly stated?
19. Are statistical inferences corrected for multiple comparisons?
- a. If not, is this labeled as uncorrected?

20. Are the results based on an ROI (region of interest) analysis?

a. If so, is the rationale clearly described?

b. How were the ROI's defined (functional vs anatomical localization)?

21. Is there correction for multiple comparisons within each voxel?

22. For cluster-wise significance, is the cluster-defining threshold and the corrected significance level defined?

## ► Additional comments

---

Additional Comments
